# Supplementary material
Source: PubMed Central journal article supplement (PMC2657362)

# Sup Fig 1A

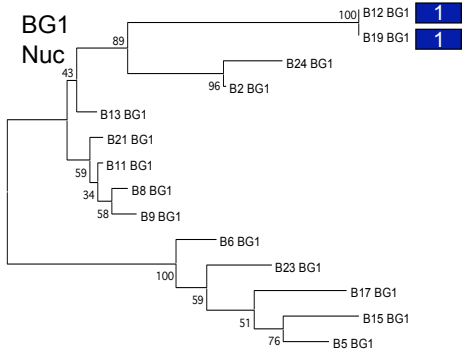

```

CGGTGCCAAAGGTCTACAGGACAGGGCAGGTACACAAACGTTGCCTCAA
CGGTGCCAAAGGTCTACAGGACAGGGCAGGTACACAAACGTTGCCTCAA
CGAAGCCAAGTGC AAATAGGACAGGGCAATGCGTGTACGTTGTTTCAAC
CGAAGCCAAGTGT AAGTAGGACAGGGCAGATGCGTGTACGTTGTTTCAAC
CGGAGCTAGGTGT AAGCAGGACAGGGCAGATACGCGTACGTTGCTCCAC
CGGACTTAGGTGT AAGCAGGACAGGGCAGATATGCCAACGTTGCTTCAAC
CGGACTTAGGTGT AAGCAGGACAGGGCAGATATGCCAACGTTGCTCCAC
CGGACTTAGGTGT AAGCAGGACAGGGCAGATCTGCCACGTTGCTCCAC
CGGACTTAGGTGT AAGCAGGACAGGGCAGACCTGCCAACGTTGCTCCAC
CGGAGCCAGGTGT AAGCTCGTCACATGGATATGCCAGAGTTGCTTCAAC
TGGACCTTAGGTGT AAGCTCGTCACATGGATCTGCCGTGAGTTGCTTCAAC
TGGACCTTAGGTGT AAGCTCGTCACATGGATATGCCGAACCACTCCAC
CCGAGCCAGGTTTAAGCTCGTCACATGGATATGCCACACCACTCGGC
TGGAGCTAGGTGT AAGCTACGTCACATGGATATGCCGACACCGCTCGGC
    
```

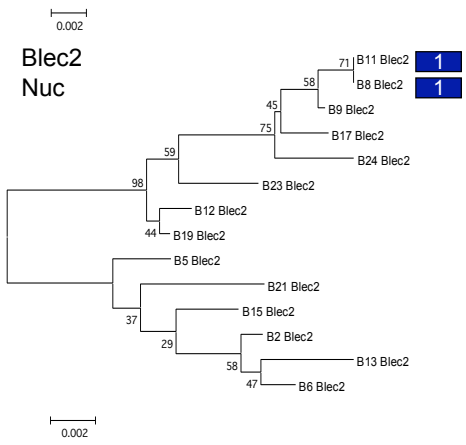

```

AGGGGGTCCGAGAGGGAACGAC
AGGGGGTCCGAGAGGGAACGAC
AGGGGGTCCGAAAGGGAACGAC
CGGGGGTCCGAAAGGAAACGAC
AAGGGGTCCGAAAGAAAACGAC
AGGGGGTCCGAAAGGATCCCCC
AGGGGGTTCGAGAGGAACCCC
AGGGGGTTCGAGAGGAAACCCC
AGGGGATCAGGGGAAACACCC
AGGACATTATGGGAAAACCCCT
AGGAAGTTAGGGGAAACACCC
AGAACATTAGGGGAAACACCC
AAAGGACTAGGGGAAACACCT
AAAACATTAGGGGAAACACCC
    
```

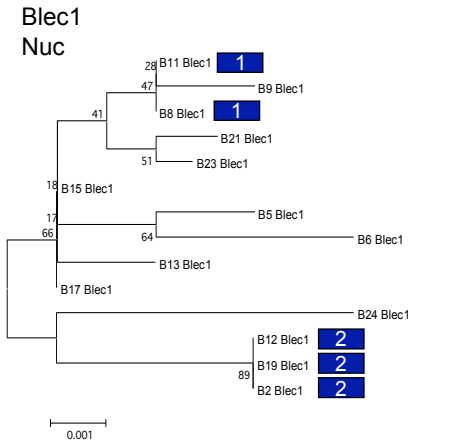

```

CGCGAACACCGCGCC
CGCGAACACCCGTC
CGCGAACACCGCGCC
CGCGAACACCTTGCC
CGCGGACACCTTGCC
CGCGGACACCGCGCC
CGTGGCCACCCGCGCC
AATGGACACCGCGCC
CGCGGACACCGCGCC
CGCGGACACCGCGCC
CGCGGATACTCACT
CGCAGACTCCACCC
CGCAGACTCCACCC
CGCAGACTCCACCC
    
```



**BRD2**  
Nuc

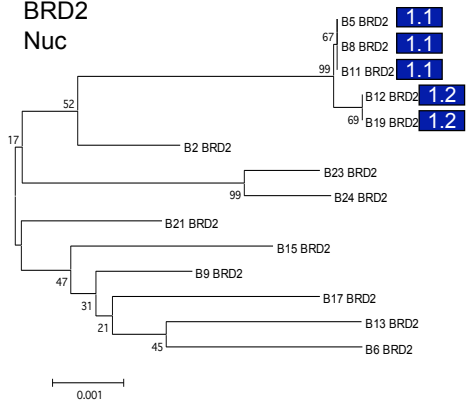

```

CGCCCCACTTAGGTCGTGTCGGCGCCTCCTCTGTCCTGTAGCC
CGCCCCACTTAGGTCGTGTCGGCGCCTCCTCTGTCCTGTAGCC
CGCTCCGCCCGGATGGTGTGCGCGCCTCTCTGGCTGACTCGTAGCT
TGCTCCGCCCGAGTGGTGTGCGCGCTCCCTCTA CCTAATCCGTGGCC
CGCCTCGGCCGGACGGCTCCGCA GCCCCCCCTGCCGTCTCACAGCC
CGTTCCGCCCGGGCGGCCTTGTGGCCCCCCTGGCTGTCTCGTAGTC
CGCTCCGCCCGAGCGGCCTCGCGGCCCTCTCGCCTGTCTCGACCC
CGCTCTGCCCGAGTGGTGTGCGCGCTCCCTCTA CCTAATTCGACGCC
CGCCTCGTCCGAGCGACGTCACGGCCCTCTCGCCCGTCTCACAGCT
CGCCCCACTTAGGTCGTGTCGGCGCCTCCCTGTCCTGTAGCC
CGCCCCACTTAGGTCGTGTCGGCGCCTCCCTGTCCTGTAGCC
CGCCCCACTTAGGTCGTGTCGGCGCCTCCCTGTCCTGTAGCC
GACCTCGGCCGGCGGCCTCGCGACTCTCTCGCTTGTCCCGTAGCC
CGCCCCGCTCGGGTGGTGTGCGCGCTCTTCTCGCCTGTCCCGTAGCC
    
```

**DMA**  
Nuc

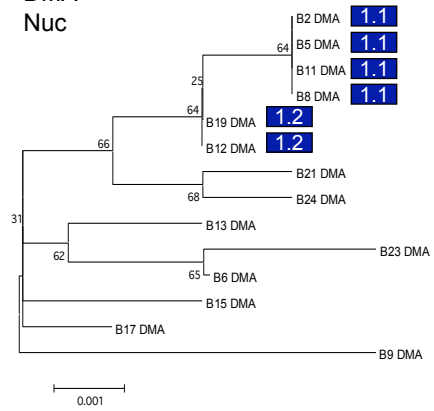

```

GGCGTGGGCCCCACAGGC
GGCGTGGGCCCCACAGGC
GGCGTGGGCCCCACAGGC
GGCGTGGGCCCCACAGGC
GGCGTGGGCCCCACGGGC
GGCGTGGGCCCCACGGGC
GGCA GGGGCCCA TGGGC
GGCGGGGCCCTATTGGGC
ACTGCCGGGCCACGGGC
AGCGCCGATTCACGGGC
GGCGCCGATCCCACGGGC
GACGCCAGCCCACGGGC
GGCGCCGGGCCACAGGC
GGCGCCGGCCTCGCGGAT
    
```

**DMB1**  
Nuc

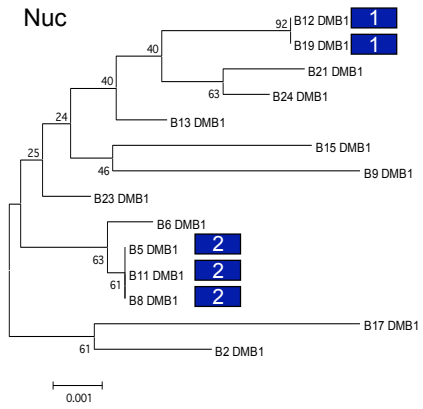

```

TAAATGGCCTCACACGGCGTC
TAAATGGCCTCACACGGCGTC
TAGGCA GCCTCACACGGCGTC
TAGGCGACCTCACACGGCGTC
TTGACGACCTCACACGGCGTC
ATGGCGGGCCCGGCACAGCTC
TTGACGACCTCGCGACTCG
TTAACGGCCTCGCACGGCGTC
TTAACGGCCTTGTACGGCGTC
TTGACGGCCTTGTACGGCGTC
TTGACGGCCTTGTACGGCGTC
TTGACGGCCTTGTACGGCGTC
TTGACGATTCGCACGTGTT
TTGACGGCCTTGCATGCGTC
    
```

### DMB2 Nuc

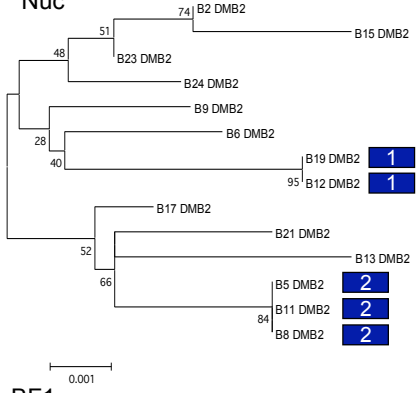

```
CCGGGGTCCGACA GCCGCGCG  
CCGAAATCCGACAGCCGCGCG  
CCGGGGCCCGACA GCCGCGCG  
CCGGGGCCCGACGCCGTGCG  
CCGGGGCTGATAGCCGCGCA  
CCGGGGTTCGATAGCTGCGCG  
CTGGGGCCCGATAATGCGCG  
CTGGGGCCCGATAATGCGCG  
CCGGGGCTAATGCCGCGCG  
TCCGGGGCAATGCCGCGCG  
CCGGGGCCAGTGCCCGCATG  
CCGGGACCCAAATGCCACGCG  
CCGGGACCCAAATGCCACGCG  
CCGGGACCCAAATGCCACGCG
```

### BF1 Nuc

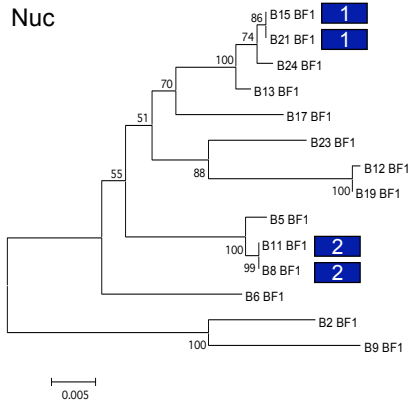

```
CCGCGGTAACATAAGACTGTGTACGGGGTGGCGCGGTGAAATGCGCTGAATTTGTTCCGTTGAAATATACAAATGAGGTGTGAGTCTCCGGCCCGCTTCCAGATTCTGGCACCCGGGCGGCTA  
CCGCGGTAACATAAGACTGTGTACGGGGTGGCGCGGTGAAATGCGCTGAATTTGTTCCGTTGAAATATACAAATGAGGTGTGAGTCTCCGGCCCGCTTCCAGATTCTGGCACCCGGGCGGCTA  
CCGCGGTAACATAAGACTGTGTACGGGGTGGCGCGGTGAAATGCGCTGAATTTGTTCCGTTGAAATATACAAATGAGGTGTGAGTCTCCGGTCTGCCCTTCCAGATTCTGGCACCCGGGCGGCTA  
CCGCGGTAACATAAGACTGTGTACGGGGTGGCGCGGTGAAATGCGCTGAATTTGTTCCGTTGAAATATACAAATGAGGTGTGAGTCTCCGGTCCGCCCTCCGGACTCTGGCACCCGGGCGGCTA  
CCGGCATAACATAAGACTGTGTACGGGGTGGCGCGGTGAAATGCGCTGAATTTCTCCGTATAATATACAAATGAGGTGCTCAGTCTCCGACCCAGCTTCTGGGCCCGGCAACCCGGGCGGCTA  
GGCTGGAAGCATAGACCCTGTACGGGGTGGCGCGGTGAAATGCGCTGCAATTGCTTATCAAGTATACAGGCAAGGATGAGTCTCCGGCCCGCTTCCAGCCCCAAGCACCCTGGCGGCTA  
GGCCGGTTGCATTTGACCCGTGACGGCAATGGCGGGTGAATCTACTGAATCTATCAACAAGTATACAGACTGGTATGAGTCTGGTTCGCCCCCGGGCCCCCGGCAACCCGGGCGGCGA  
GGCCGGTTGCATTTGACCCGTGACGGCAATGGCGGGTGAATCTACTGAATCTATCAACAAGTATACAGACTGGTATGAGTCTGGTTCGCCCCCGGGCCCCCGGCAACCCGGGCGGCGA  
CCGCGGTAACATAAGACTGTGTACGGGGTACCCGGTGAATGCGCTGAATCTGACCAGAGAGTATACAGACTGGTTCGCCCGCTCTCCGGCCACCCGGCACTTGGATGGCTG  
CCGCGGTAACATAAGACTGTGTACGGGGTACCCGGTGAATGCGCTGAATCTGACCAGAGAGTACACAAATGAGGTGCGCAGTCTGGCCCGCTCTCCGGCCACCCGGCACTTGGATGGCTG  
CCGCGGTAACATAAGACTGTGTACGGGGTACCCGGTGAATGCGCTGAATCTGACCAGAGAGTACACAAATGAGGTGCGCAGTCTGGCCCGCTCTCCGGCCACCCGGCACTTGGATGGCTG  
CCGCGGTAACAATTACTCGTGGCTAGGCAGGCGGTGAAATGCGCTGAATCTGACCAGAGAGTACACAAATGAGGTGCGCAGTCTGGCCCGCTCTCCGGCCACCCGGCACTTGGATGGCTA  
CCCGGTAATCTAAGACCACTGCTAGCACAGGCGATACCGCAACGTGCGCCCTGACCAATGGTACCTGAATGAATAAAACAGCGCGGTCCGCCCTCCGGGCCCGGAGGCCCCAGTCTCTGAGCACTTA  
CCGGCATAATATAAGACCACTGCTAGCACAGGCGATACCGCAACGTGCGCCCTGCTTTTCAAGATTACAGAGCTATAAAACAGCGCGGTCCGCCCGGAGGCCCCAGTCTCTGAGCACTTA
```

### TAP1 Nuc

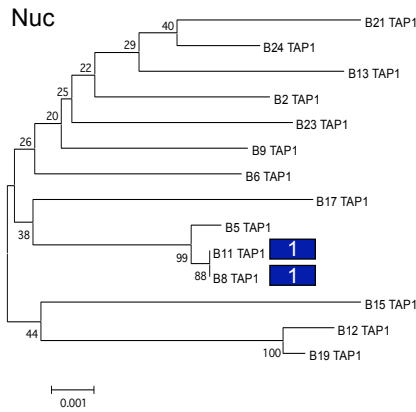

```
GCATCGTCCACGCTGTTGGTAGCCGCGCAATAATGAGCCAGCAACCCGCGGCTCGCTCAGGCCCGCAATG  
GCGCCGCCACGCTTGGTTGGCCCGTTACGGCAATGTGAGCCAGCAACCCGCGGCTCGCCAGGCCCGCAATG  
GCGCCACTTACGCTTGGGCAACTAGCCACGGCCATATGAGCCAGCGCCCGGCTCGCCAGGCCCGCAATG  
GCCTCGCCCGGCTTGGTTGGCCCGTTACGGCCATGTGAGCCAGTCCCGCGGCTCGCTCCGGACCCCGCAATC  
GCACCGTCCGCTTCTGGGGCGCCCGCCACGGCCGTGTGAGCTAGCGCCCGCGGCTCGCCCTGGGCCCCGCAATC  
GAATCGCCACGCTTCAAGCGCCCGCCACGGCCATGTGAGCCAGTCCCGCGGCTCGCCAGGCCCGCGGCTG  
GGCCCGCTTGGCCCTGGGCGGCGCCACAGCCACTGTGAGCTGAGCCAGTTCGCGGCTCGCCAGGCCCGCAATG  
GAGCCGCGCGCACTGGGCGCAACCAACCGCCATGTGAGCCAGCAACCCCTTGGCTTGGCCCGGCGTGCAGTG  
GAGCCGCGCGTGCCTGTTGGCCCGTTAAGGCCATGTGAGCCAGCGCCACCGACTCGCCCGGTTCTGCAGTG  
GAGCCGCGCGTGCCTGGGCGGCGGTTAAGGCCATGTGAGCCAGCGCCACCGACTCGCCCGGTTCTGCAGTG  
GAGCCGCGCGTGCCTGGGCGGCGGTTAAGGCCATGTGAGCCAGCGCCACCGACTCGCCCGGTTCTGCAGTG  
CCGCCCGCGGCTCCAGGCGATTCGCCGACTCATGCCGACCGGACCGCCCGCGGCTCGCCCGGTTCCCGCAGCG  
GAGCTGCCTACGCTGGTGTATCCGCCAAGGCAATGTGAGCCAGCTCCGCCAGCTCGCCCGACTTCCGGGCG  
GAGCTGCCTACGCTGGTGTATCCGCCACGGCAATGTGAGCCAGCGCCCGCACTCGCCCGACTTCCGGGCG
```

## TAP2

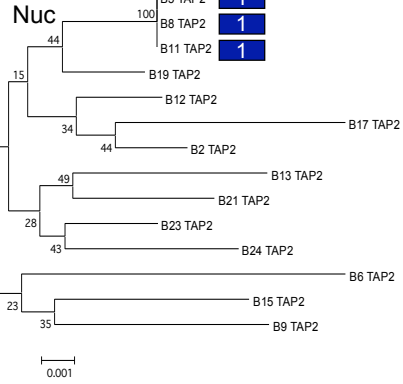

```
GGGCGAGCCGCCACCGCCAACTGGTCCGTCGCAGCCACGGGGGTACAGGCAACGGTCCGGGACCAAGGCCCGGTCGTGCTGCG  
GGGCGAGCCGCCACCGCCAACTGGTCCGTCGCAGCCACGGGGGTACAGGCAACGGTCCGGGACCAAGGCCCGGTCGTGCTGCG  
GGGCGAGCCGCCACCGCCAACTGGTCCGTCGCAGCCACGGGGGTACAGGCAACGGTCCGGGACCAAGGCCCGGTCGTGCTGCG  
GGGCGGAGCCGCCACCGCCAACTGGTCCGTCGCAGCCACGGGGGTACAGGCAACGGTCCGGGACCAAGGCCCGGTCGTGCTGCG  
GGTTCGAGCCGTCACATTGTTCAACGGGTCGGTCGCAGCAGCGGGGACACAGCCACTGGCTTGAAGCAAGCGCCAGCCACACCGCA  
GGGCGAGTCGCCCACCGCCAACTGGTCCGTCGCAGCAGCGGGGACACAGCCACTGGCTTGAAGCAAGCGCCAGCCACACCGCA  
GGGCGAGCCGCCACCGCCAACTGGGTCGGTCGCAGCCATGGAGGACATGCGTGGCAAGCCAGGACACCGGCCCGGCTACGCCGG  
GGGCGAGCCGCCACCGCCAACTGGGTCGGTCGCAGCCATGGAGGACATGCGTGGCAAGCCAGGACACCGGCCCGGCTACGCCGG  
AGTTCGAGCCGTCACACCGCCAGCGGGTTCGTGCGAGTCACGGGAGTACGGGTTGGCAGCCCGGGACAGCGGCTGGCCGTGCCGG  
GGGCGAGCCGTCACACCGCCAGTGGTCCGTCGCAGTACGGGAGTTCGGGTTGGCGCCCGGATCAAGGCCTAGCCTGCAACCGCG  
GGCAGGAGCCGCCACTCTCCAACCTGGTCTGTTGTCGCCAAGAGGTTTGGGGGGCAACCGCAAGGTCGACCCGTGCCGTG  
GACCCAGCCCTTACCTGCTGGCTGATCCGTCGCAGCCACGGGGACTGGGCAAGGCTCGAGATCGCGGCCCGGCTCCGTACCGCG  
GGCGTGAGCCGCCCTCTGCTAGCTGACCAATCGCAACCAGAGGGGTTGGGGCGCGTCCGGGACCGCGGCCGGTTCGTGTTACG
```

## BF2

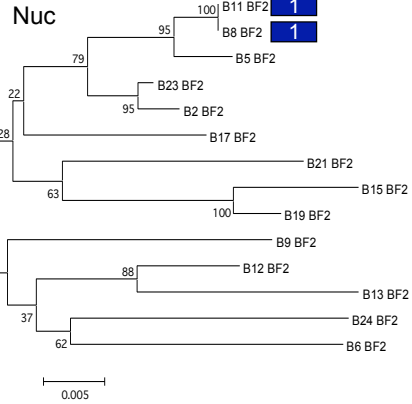

```
CTCCGGCATAAGACCGTCGTACGGGTTGACATCGGAGGAAATGCGAGAAATTGCGTTGAAACGATAACATCATTGCTCGCGAGATATGGGCTCAGCCCGGTCGGTTGGGGCGGGGTAAACACAT  
CTCCGGCATAAGACCGTCGTACGGGTTGACATCGGAGGAAATGCGAGAAATTGCGTTGAAACGATAACATCATTGCTCGCGAGATATGGGCTCAGCCCGGTCGGTTGGGGCGGGGTAAACACAT  
CTCCGGCTCTTTATTACCGTACGGGTTGACATCGGAGGAAATGCGAGAAATTGCGTTGAAACGATAACATCATTGCTCGCGAGATATGGGCTCAGCCCGGTCGGTTGGGGCGGGGTAAACACAT  
GCCCGGCAATTAGACCGTCGTACGGGTTGACATCGGAGGAAATGCGAGAAATTGCGTTGAAACGATAACATCATTGCTCGCGAGATATGGGCTCAGCTCCGGCGGTTGGGCGCGGGGTAAACCGGT  
GCCCGGCTTTAGACCGTCGTACAGGTTGACATCGGAGGAAATGCGAGAAATTGCGTTGAAACGATAACATCATTGCTCGCGAGATATGGGCTCAGCTCCGGCGGTTGGGCGCGGGGTAAACCGGT  
GCCCGGCAATTATTTCATGGGTTGGGTTGACATCGAAACAAAATGCGAGAAAGTACGTTGCAACGATAGAGGCAATTGCTCGCGAGATATGGGCTCAGCTCCGGCAAGTTGGAGCGGGCGGCTACGTTGT  
CTCCGGGCTTTGACCATCTGCTACACCAAGATCGTAGGAGATACGAGAAATGCAATTGCAATGACAGCATGTTGCTAGCGAGGATATGGGCTCAGCTTCAAGCGGTTGGGGCGGGGTGATACGGTT  
GCCGGTCTAAGACCACCGGCTACACCATGACCTCACGACATGCGATGGGCTACGTTAAACGAAAGGATTCATTACTCAGAGATATGGGCTCAGCTTGGCGCGCCAGGTTGCGAGCCGACACCGGT  
GCCCGATCTATGACCACCGGCTACACCATGACCTCACGAGATGCGATGGGTTACATTGAAACGACGATTCATTGCTCGCGAGATATGGGCTCAGCTTGGCGCGCCGGGGCGGGCGGACACCGGT  
GCCCGGCTATGACCACCGGCTCCACTGACATCGCAGGAAAGCGGAGAAAGTCCGTTGAGGCATGAGTAAATCTCCGAGGGTTGGGTTGAGTCTCTGGCGGTTGGAGCGGGGTGATACATTC  
GCCCGGCAATAACTCGTCTGACAGGTTGACATCGGAGGAAATGCGAGAAAGTACGTTGAAACGCGTAATGCTACTGCTCGGAGAGGAACAAGTGAATCTCCGGCGGTTGGGCGCGGGGTAAACCGGT  
GCCCGGCTATACTTGTGCTACACACTGACATCGGACTAAATACGAGAAAGTATGTTGTAATGAGGTCATCATACAGGAGAGGAACAAGTGAATCTCCGGCGGTTGGGCGCGGGGTGATACGAT  
GCCCGGTTATTATTATCATCGCTGGGCTGACCTGGGCGGCAATAAGAGGAAGTACGCTGAAACGCGTAATGTCATCATAACCGTAGATATGACTGAATTCGGACCGGTTAGGGCAGAGCCGACACCGGT  
GCTCCACAATAAGACCACCTGCTGGGCAAGATCGGAGGCAAGCGAGAAAGTACGCTGAAACGAAAGTATCATCATAACGGAGAGTTGAGTGAATTCGGGCTATTGGGGCGGGCCCGATCCGGT
```

BG1  
AA

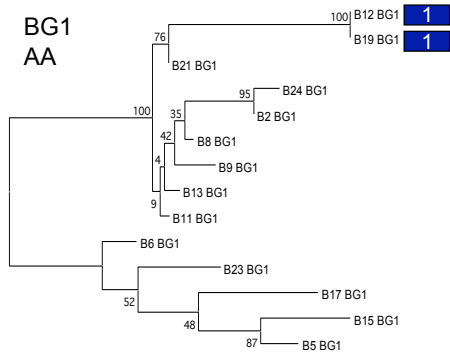

0.005

```

PRR I Q E K D L T K V I V G T Y E G V N T K E N Q I D
PRR I Q E K D L T K V I V G T Y E G V N T K E N Q I D
PRR N Q E D D Q T K V I V G T Y E R V N A E E D K I D
P R H N Q E D D Q I K V I V G T Y K R V S A E D N Q I D
P R H N Q E D D Q I K V I V G T Y E R V S A E D N Q I D
P R R N Q E D D Q T K V I V G T Y E R V S A E D D K I D
P R R N Q E D D Q T K V I V G T Y E R A S A E E D K I D
P R R N Q E D D Q T K V I V G T Y E R V N A E D D K I D
P R R N Q E D D Q T K V I V G T Y E R V N A E E D K I D
P R R N Q E D D Q T M L V L I A I C E R V N A E E D K I D
L R R N H V D D Q T M L V L I A I C E R V S A E D D K I D
L R R N H V D D Q T M L V L I A I C E R V N A E D D K T N
P T R N Q E D Y Q T M L V L I A I C E R V N A E D D K T N
L R R N Q E D D Q T I L V L I A I C E R V N A E D D K T D
    
```

Blec2  
AA

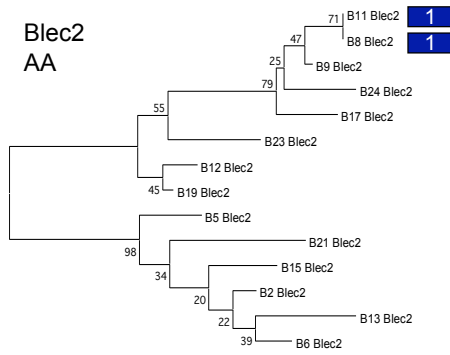

0.005

```

K R V G E I H T W N R E G G D K A R
K R V G E I H T W N R E G G D K A R
K R V G E I H T W N K E G G D K A R
K Q V G E I H T W N K E G K D K A R
T R V G E I H T W N K E G E D K A R
K R V G E I H T W N K E G E V Q A T
K R V G E I Y T W N R E G E D Q A T
K R V G E I Y T W N R E G E D K A T
K R V G K I H K W S R G E K D Q E T
K R M G K I Y K L S R G E K D K A T
K R M R E I Y K W S R G E K D Q E T
K R M G K I Y K W S R G E K D Q E T
K Q V G K T Y K W S R G E K D Q E T
K Q M G K I Y K W S R G E K D Q E T
    
```

Blec1  
AA

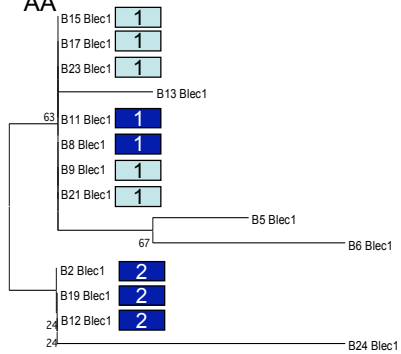

0.001

```

H G A K T P P A P
H G A K T P P A P
H G A K T P P A P
H G A K T A P A P
H G A K T P P A P
H G A K T P P A P
H G A K T P P A P
H G A K T P P A P
H G V N T P P A P
N S V K T P P A P
H G A K T P P T P
H G A K T P P T P
H G A K T P P T P
H G A K M P S T S
    
```

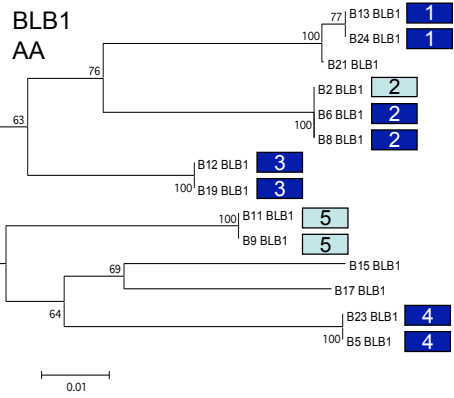

```

QWTFKAHYVYVVEYAHATA GPQAYNILNRMNETYVSCLV
QWTFKAHYVYVVEYAHATA GPQAYNILNRMNETYVSCLV
QWTFKAHYVYVVEYAHATPGPQAYNILNRMNETYVSCLV
QWTFKAHYAFEHIQFMYPATPGRQAINILDEMNAATFGSCLV
QWTFKAHYAFEHIQFMYPATPGRQAINILDEMNAATFGSCLV
QWTFKAHYAFEHIQFMYPATPGRQAINILDEMNAATFGSCLV
FCGAI FHYVFDEIQYAYATPGPQAYNFMNRMNETFGSCLV
FCGAI FHYVFDEIQYAYATPGPQAYNFMNRMNETFGSCLV
FYGMIAHYVLEQIQFAYGTAGPQAYDYLNRMNRFNPCQV
FYGMIAHYVLEQIQFAYGTAGPQAYDYLNRMNRFNPCQV
FYGVIFQFVLEQIQTSYATPDYQVIDILNRMNETVDSWLA
FYGVIFQFVYEQIQLRYASPGYS AIDIMDRMNAARYFSCQV
FDGMSQFVFEQIQYAYATPGRPSYNILYKRGQRYFSCLV
FDGMSQFVFEQIQYAYATPGRPSYNILYKRGQRYFSCLV

```

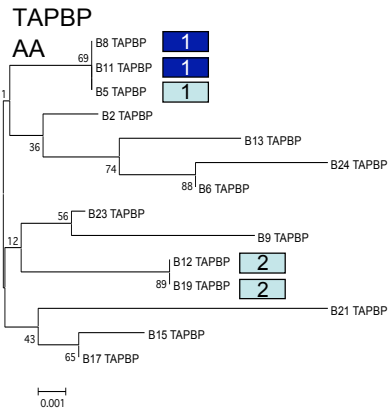

```

GRLQGGTPARTRAGRVCVT
GRLQGGTPARTRAGRVCVT
GRLQGGTPARTRAGRVCVT
GRLQGGTSARMRAGRRTV
GLLQGRTPARMRAGRHVVT
GRMQGRTPTRMHAGRRTV
GRLQGRTPTRMRAGRRTV
GRLQGGTPARTRAGRRTV
GRLHSGTPARTRAGRQRTV
GRLQGGTSARTRAGRRTV
GRLQGGTSARTRAGRRTV
RRLQGGAPAQMRASQRTV
GRLQGGTPARTRTSRRVT
GRLQGGTPARTRASRRVT

```

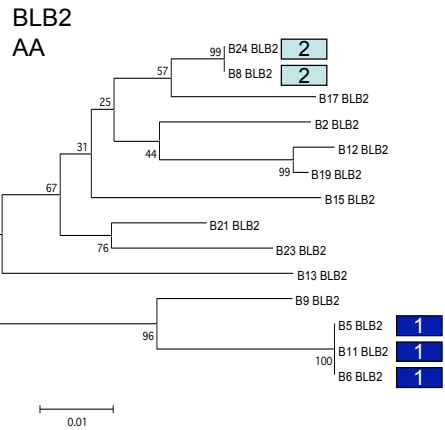

```

RVAFYAGHYVYDEYAFTPGPAYNLLN LMIAGPILSLA
RVAFYAGHYVYDEYAFTPGPAYNLLN LMIAGPILSLA
RVGFYRGHYVYDEYAFTPGRAYNLLN LMIAGSVVSLT
RVAFCAFHYVYQYLVFTPGPAYNLLN LMIAGSILSLA
RVAFCA SHYVYQYFTFSPGPAYNLLN RMEVRFVLSLA
RVAFCA SHYVYQYAFSPGPAYNLLN RMEVRFVLSLA
RVAFHVAHYAFAHYAYTPGPAYNLLN LMTVGPILSQA
SVAFYKGHYVFDQFAFTPGRAYNLLN LMEVRVILSLA
RVASRRAHYVLDQFAFTAGRAYNLLN LMEVRVVFSLA
RVAFYRAHYVFDQLMFTPGPAYDFMIKREVTFVNPQA
RMAFYMLHYVDQTSYSPDYVINILN RMEVTVVVSLA
RVAFYVVFQFVYDQTSYTPDYVIDFLN RMEVRYVVSQA
RVAFYVVFQFVYDQTSYTPDYVIDFLN RMEVRYVVSQA
RVAFYVVFQFVYDQTSYTPDYVIDFLN RMEVRYVVSQA

```

BRD2  
AA

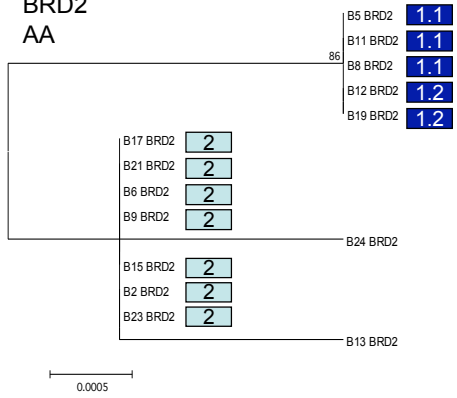

Q S D T  
Q S D T  
Q S D T  
Q S D T  
Q S D T  
Q S D T  
Q S E A  
Q S E A  
Q S E A  
Q S E A  
L S E A  
Q S E A  
Q S E A  
Q S E A  
Q S E A  
Q I E A

DMA  
AA

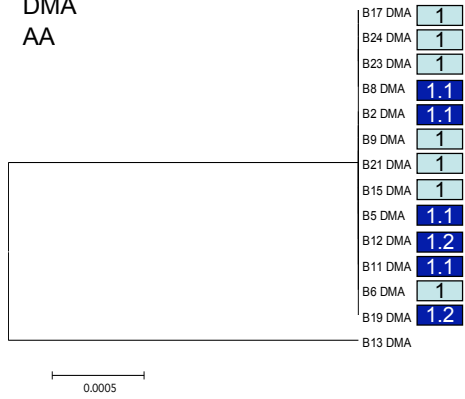

S  
S  
S  
S  
S  
S  
S  
S  
S  
S  
S  
S  
S  
S  
S  
L

DMB1  
AA

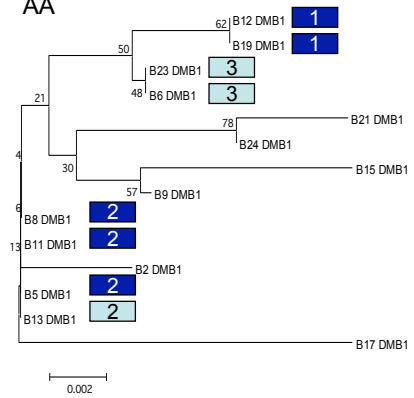

L S M V P I A V A S  
L S M V P I A V A S  
F S M V P I A V A S  
F S M V P I A V A S  
L G V I P I A V A S  
L G V V P I A V A S  
F G V V P T A M A S  
F G M V P I A M A S  
F G M V P I A V A S  
F G M V P I A V A S  
F G M V P I V I A S  
F G M V P I A V A S  
F G M V S I A V V F



### DMB2

AA

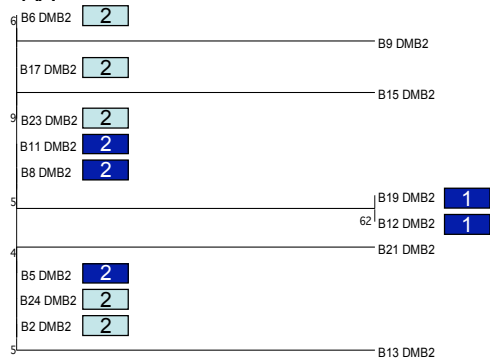

APVHA  
 APVHT  
 APVHA  
 APMHA  
 APVHA  
 APVHA  
 APVHA  
 ASVHA  
 ASVHA  
 VPVHA  
 APVHA  
 APVHA  
 APVHA  
 APVRA

0.0005

### BF1

AA

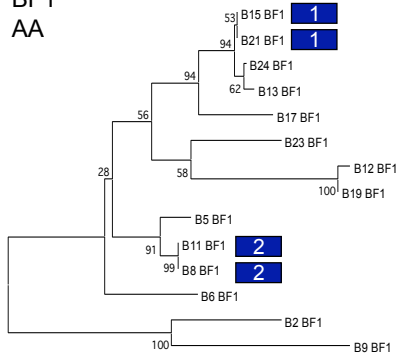

RVACALT I HQYDVYMKAGQGRRSVKVSDTLEYVWFRVYKFI FDKDMKVGWSWGGVAGMAGIRGAGGSSI  
 RVACALT I HQYDVYMKAGQGRRSVKVSDTLEYVWFRVYKFI FDKDMKVGWSWGGVAGMAGIRGAGGSSI  
 RVACALT I HQYDVYMKAGQGRRSVKVSDTLEYVWFRVYKFI FDKDMKVGWSWGGVAGMVGIRGAGGSSI  
 RVACALT I HQYDVYMKAGQGRRSVKVSDTLEYVWFRVYKFI FDKDMKVGWSWGGAAAGMVGIRGAGGSSI  
 RVACTLT I HQYDVYMKAGQGRRSVKVSDTLEYVLSRYYKFI FDKDMKVG LQWGRVVG VAGIRGAGGSSI  
 GLVCAHTVHQYDVYMKAGQGRRSVKVSDTLEYVWSYSYRF I FDKGAKVRWSWGGAADVASIRGAGGSSI  
 GLACALSVHLFDVYMNTGQGGRSVEVSN TLEYVLYHTYRF I FDKGTMVRWSGGGAAGVAGIRGAGGSAI  
 GLACALSVHLFDVYMNTGQGGRSVKVSN TLEYVLYHTYRF I FDKGTMVRWSGGGAAGVAGIRGAGGSAI  
 RVACALT I HQYDVYMKAEQAGRSVKVSDTLEYAWYHEYRF I FDKGTMVGRQWGGAAAGVAGIRGMGGSSV  
 RVACALT I HQYDVYMKAEQAGRSVKVSDTLEYAWYHEYRF I LDKDMKVGRQWGGAAAGVAGIRGMGGSSV  
 RVACALT I HQYDVYMKAEQAGRSVKVSDTLEYAWYHEYRF I LDKDMKVGRQWGGAAAGVAGIRGMGGSSV  
 RVACALT I QLFTVAMKAREGRRSVKVSDTLEYAWYHEYRF I LDKDMKVGRQWGGAAAGVAGIRGAGVSSI  
 RLACALT I SQYDTAINTREAGQIDRENDIRQHAWYHMCRF I LAEDMKYRKQGGVAGVAGLCCGADGSSI  
 RVGSTLT I YQYDTAMNTREAGQIDRENDIRQHAWSFYSYRYFFDKGTM YRKQGRGAAGVASLCEADGLSI

0.01

### TAP1

AA

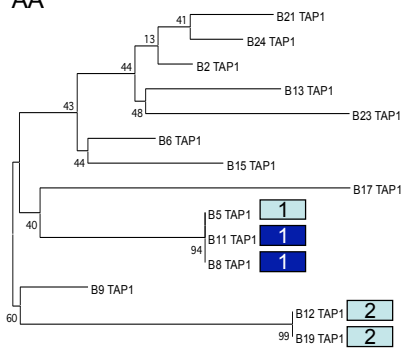

TERMEARRNYRTTRAWARQQESGEG  
 TERMEVRRNYRTTRARARQQESGEG  
 TERMEVRRNYRATRARARQQESGEG  
 TKRMKARRNYRATRARARQQESGEG  
 TERMEARRSYRATRARVRQQQSGEG  
 TERMEARQNYEATRARARQQESGEG  
 TERTEAQRNYEATRARARQQESGEG  
 KEHMEARRNCETMRARAREQESGEG  
 KECMEVRRNYEATHARARQQESGEG  
 KECMEVRRNYEATHARARQQESGEG  
 KECMEVRRNYEATHARARQQESGEG  
 KERMEARRNYEATRTRARQQESGEG  
 KERMEARRNYEATRARAQQEEI IAVM  
 KERMEARRNYEATRARAQQEEI IAVM

0.001

TAP2  
AA

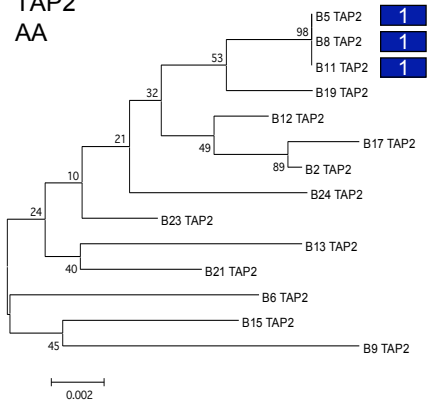

```

RWRALTRIAALVDHQVHGKANAGVVARGERHVIITR
HSHALTGVSTLVDHQVRSNADAGMTARGERRVITR
RWRALTRIAALVDHQVHGKANAGVVACGKRPPVTR
RWHALTRISALVDHQVHGKANAGMVACGKRRVVTR
RWHALTRVAALVNYQVRSKVDAGVVARGEKRRVVTR
RWHALTRIAALVDHRVRSKANAGVVARGERHVIITR
RWHALTRISALVDHQVHGKANAGMVACGKRRVVTR
RWHALSRVSTPIDHQVRGNADAGVVACGERRVVMH
RWHALTRISALVDHQVHGKANAGMVACGKRRVVTR
RWHALTRVAALVDYQVHGKADAGVTARGERRVVTR
RWHALTRISALVDHQMRGNVDAGVVTRGEKRIVTR
RWPGVTRVAALVDHQVRSKVDPGVITARSQRRVVTR
RWHALTRVAALVDYRVHGNADAGVVARGKRHVITR
RWHALTRIAALVDHRVRSKANAMVARGERHVIITR
  
```

BF2  
AA

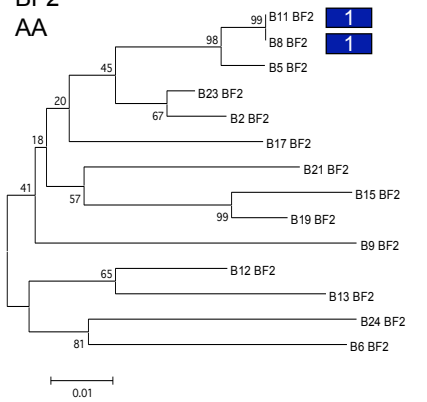

```

SACAHQYDVVYMKAEQGIGGNIDRENDILRVWYEDGTYTYFIFGTMFTGDYAGLQGRGVRGQGAVMCKKSTI
SACAHQYDVVYMKAEQGIGGNIDRENDILRVWYEDGTYTYFIFGTMFTGDYAGLQGRGVRGQGAVMCKKSTI
SACASLFITYMKAEQGIGGNIDRENDILRVWYEDGTYTYFIFGTMFTGDYAGLQGRGVRGQGAVMCKKSTI
PACAHLYDVVYMKAAQQGIGGNIDRENGILQVWYEDGTYMYFIFGTMFTGDYAGLQWRGVRGHGAVMKRSAI
PACARLYDVYIKAAQQGIGGNIDRENGILQVWYEGGPYMYFTFPGTMFTGDYAGLQWRGVRGHGAVMKRSAI
PACAHLFIMAMKAQQQIEHNDRENGTLQVRS EDGTYEDFIFGTMFTGDYAGLQWRVRDQGAVVKRLAI
SACARLFDMAINTQREIVGSI NRENDILRVWSE DGT HAYFVFGTMLTGGYAGLQWRGVRGQGAVVKRSSI
PGCASQYDTAINTQSETSRITDRDGGTLQVLYEDGTSDFIFDTMFTGDYAGLQWRGAQQGQAVVKRSAI
PACTSQFDTAINTQSETSRSIDRDGGILQVWYEDGTRYFYFIFGTMFTGDYAGLQWRGARQQGAVVKRSAI
PACASQFDTAMNTQQQIAGNSDRENGTLRVWYGGSPFEYLI FDTMFSGGVAGWSWRGVRDQGAVVKKLST
PACAQQFTVYIKAAQQGIGGNIDRENGILQVWYEGGPYMYFTFPGTMFTESEPRWNWRGVRGHGAVMKRSAI
PACARQFTVYINTQQQIGLNINRENGIRQVWFEDGTRSIFYILDMKFTSESEPRWNWRGVRGHGAVVKRSTI
PACAYLFIAMKAQQQLGGHVNSEDDTLQAWYEGGPYMYFILD MKFTVDYASWNWQGVRGQDITVVKRSAI
LASTQQFDTAMKAQREIGGHTDHGNGILQAWYEDGTSYFYILDMKFTGDVARWNWRGVRGQGLVTRSAI
  
```

Sup Fig 1B

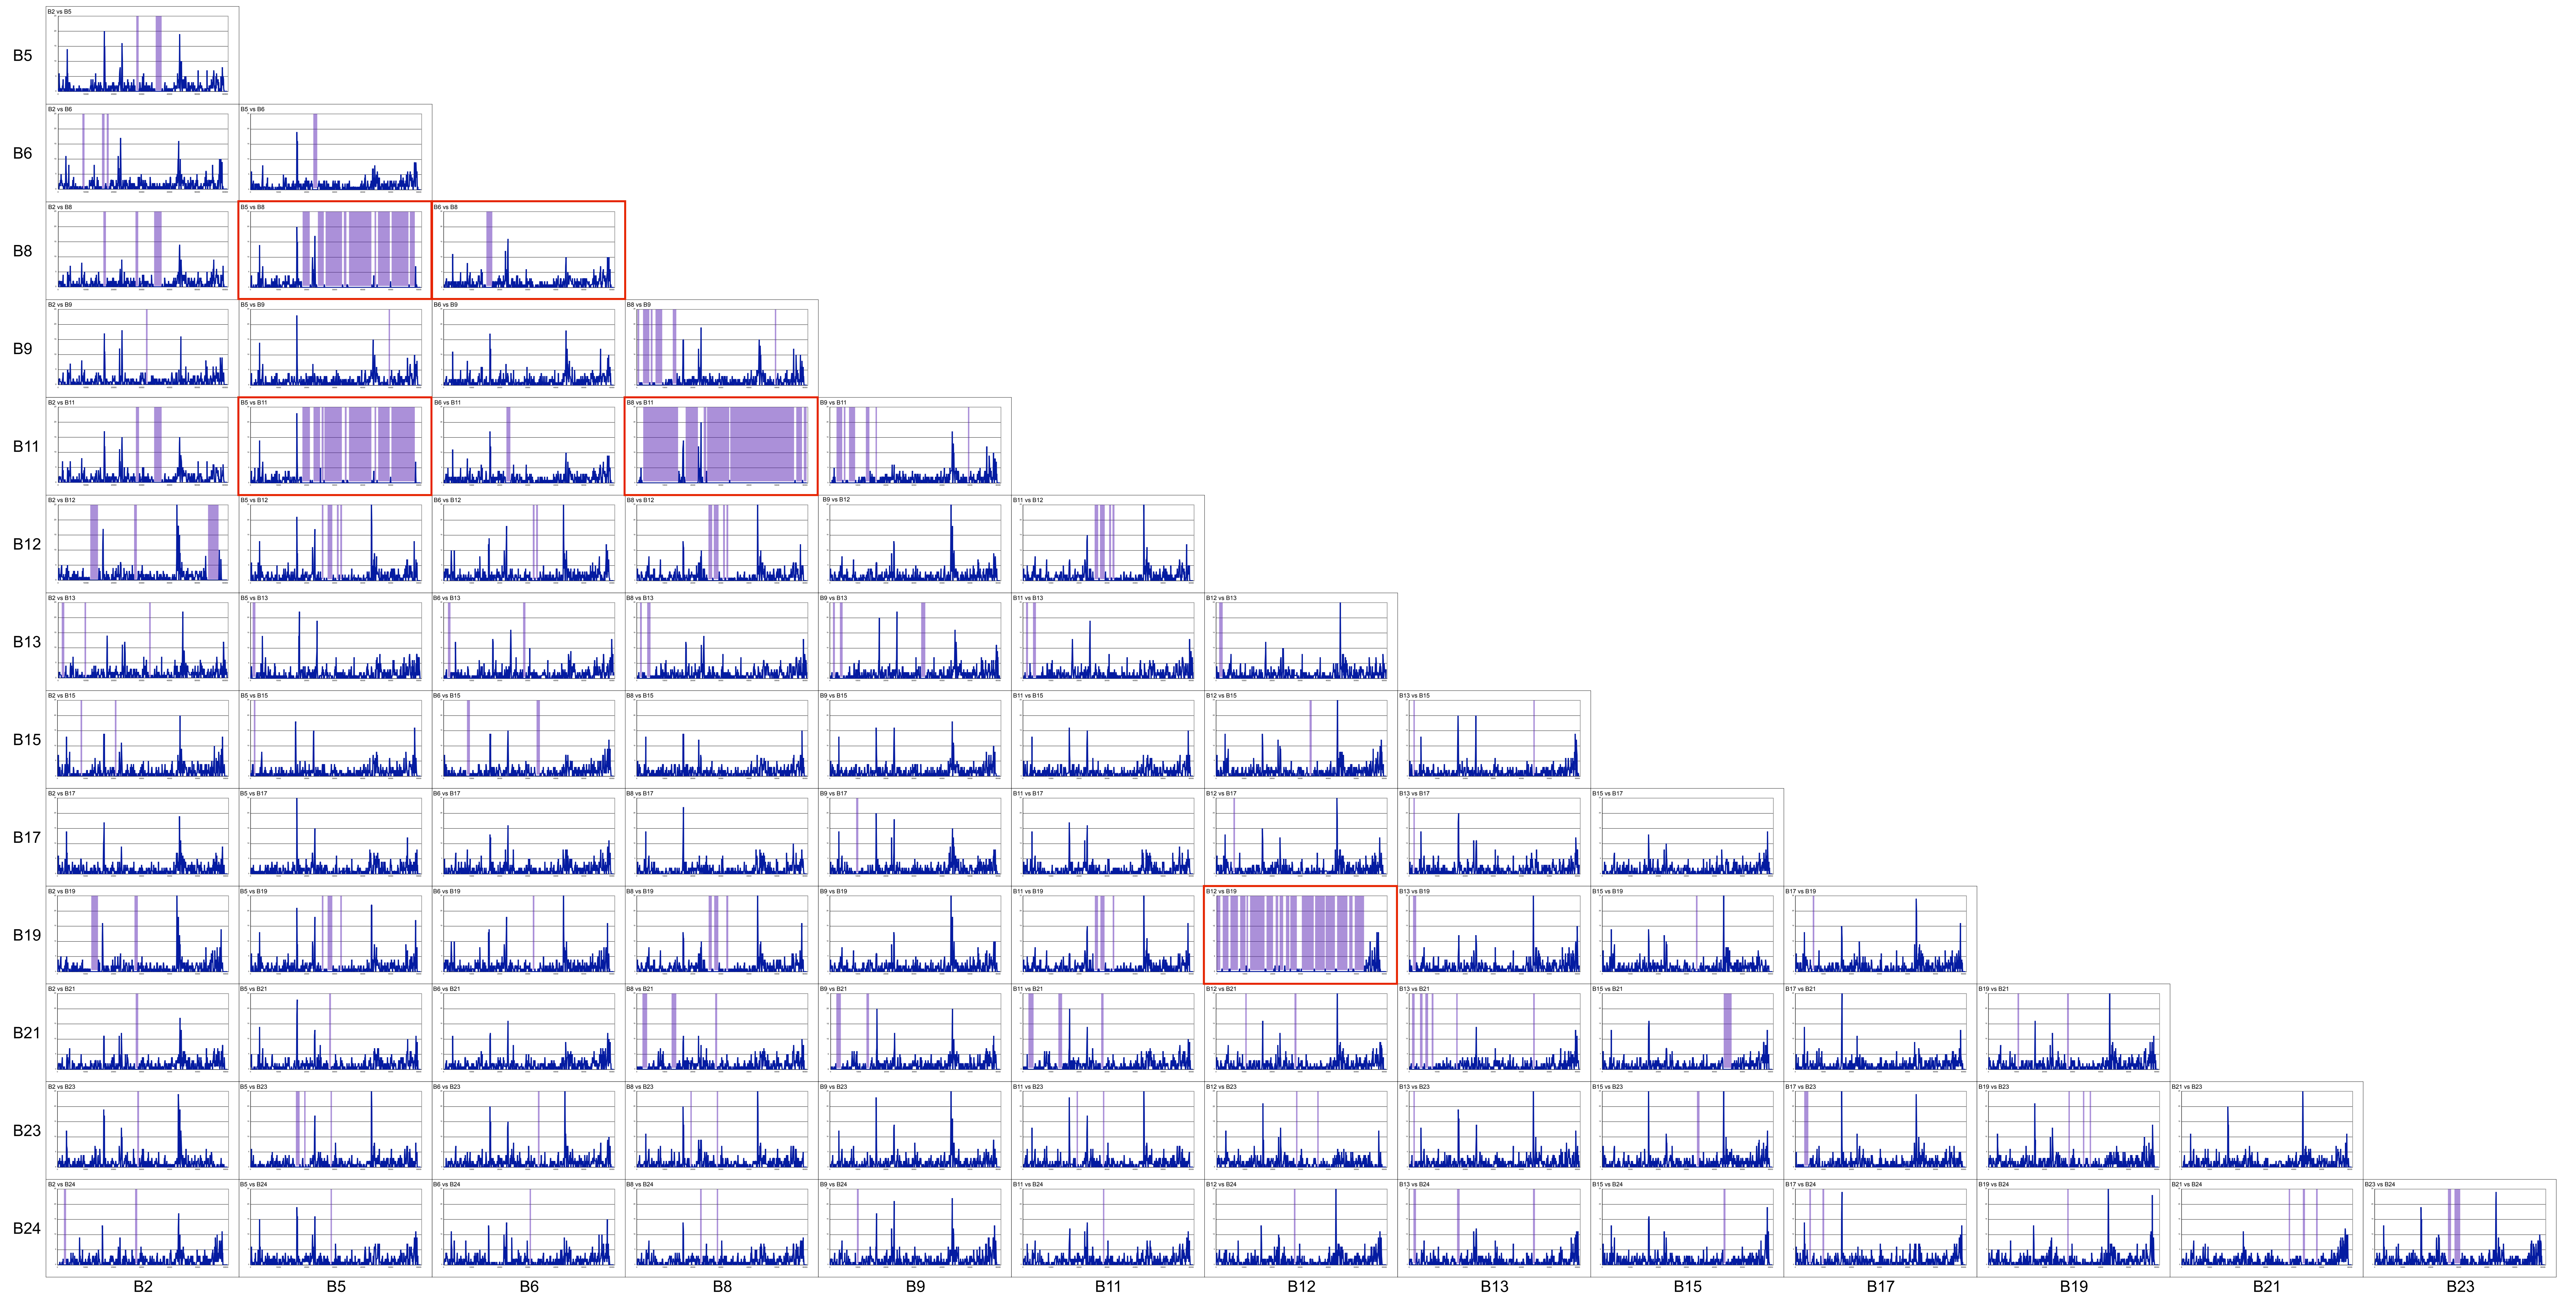

Supplement: NIHMS95801-supplement-part_1.pdf [file NIHMS95801-supplement-part_1.pdf]
