# Supplementary material
Source: PubMed Central journal article supplement (PMC2657362)
Supplement: NIHMS95801-supplement-part_2.pdf [file NIHMS95801-supplement-part_2.pdf]

**Sup Table 1A. Long-range PCR primers and conditions**

| Gene region  | Nucleotide position | Length (bp) | Intergenic region | Primer name   | Primer sequence               | Annealing Temp. (oC) | Amplified Length (bp) | Included exon      | Number of Sequencing primer |
|--------------|---------------------|-------------|-------------------|---------------|-------------------------------|----------------------|-----------------------|--------------------|-----------------------------|
| <i>BG1</i>   | 129025 - 132794     | 3770        |                   | BG1_F4        | GCAAAGATTGATGCTGGGTGTAGCC     | 68                   | 4531                  | <i>BG1_e1~e16</i>  | 22 (Fwd: 11, Rev: 11)       |
|              |                     |             |                   | BG1_R46       | GATACGTGGTCACACTGTTCCCAAA     |                      |                       |                    |                             |
| <i>Blec4</i> | 133807 - 135856     | 2050        |                   | Blec4_F       | CCGGTGCTGGATCCATCTGATGTCTG    | 68                   | 4450                  |                    | 20 (Fwd: 10, Rev: 10)       |
|              |                     |             |                   | Blec4_R       | TGGAGGGCGACGTCTGTAGTGGTGAA    |                      |                       |                    |                             |
| <i>Blec2</i> | 136593 - 139085     | 2493        |                   | Blec2_F2      | CAGAACCGCTGCTTTCCTTGACACA     | 68                   | 4359                  | <i>Blec2_e1~e6</i> | 19 (Fwd: 10, Rev: 9)        |
|              |                     |             |                   | Blec2_R3      | GTCCGCTGATGCTGAATGCGAAAAT     |                      |                       |                    |                             |
| <i>Blec1</i> | 140952 - 143025     | 2074        |                   | Blec1_F3      | CATCATCTGCTTCATTTCCAATCCCC    | 68                   | 3598                  | <i>Blec1_e1~e5</i> | 21 (Fwd: 11, Rev: 10)       |
|              |                     |             |                   | Blec1_R1      | TTCCTGTGACAAAACACCGTTAAAAGTGA |                      |                       |                    |                             |
| <i>BLB1</i>  | 143849 - 145212     | 1364        |                   | BLB1_SF2      | GGCGGAGCTTCGGCTCCAAATTACAT    | 68                   | 2421                  | <i>BLB1_e1~e6</i>  | 22 (Fwd: 13, Rev: 9)        |
|              |                     |             |                   | BLB1_SR2      | CATGAGGGGATCATGAAGGGGCAGAG    |                      |                       |                    |                             |
|              |                     |             | <i>BLB1-TAPBP</i> | BLB1_SF3      | TCACCCGTCTCCAGGCAGAGTT        | 68                   | 1353                  |                    | 8 (Fwd: 5, Rev: 3)          |
|              |                     |             |                   | BLB1_SR3      | GACAATGGGAGATCATGGATTGGGT     |                      |                       |                    |                             |
| <i>TAPBP</i> | 146197 - 149646     | 3450        |                   | Tapasin_F1    | TCTACCTGGACTTGTGTGCGGCCATT    | 68                   | 4191                  | <i>TAPBP_e1~e8</i> | 35 (Fwd: 18, Rev: 17)       |
|              |                     |             |                   | Tapasin_R2    | ACTCATCTGCCTCACCAACCCAGGA     |                      |                       |                    |                             |
| <i>BLB2</i>  | 150683 - 152034     | 1352        |                   | BLB2_F2s      | CTCTCCGCTGCTTTGCGCTTT         | 68                   | 2484                  | <i>BLB2_e1~e6</i>  | 19 (Fwd: 9, Rev: 10)        |
|              |                     |             |                   | BLB2_R3s      | GCGACATCTCCAACGGACG           |                      |                       |                    |                             |
|              |                     |             | <i>BLB2-BRD2</i>  | BLB2_SF1_2    | TGACCTCGTCTCGCTGTGTTTCAGG     | 68                   | 1524                  |                    | 6 (Fwd: 4, Rev: 10)         |
|              |                     |             |                   | BLB2_SR1      | GACTCGGATTCGGGTAAACCCAC       |                      |                       |                    |                             |
| <i>BRD2</i>  | 153386 - 157147     |             |                   | BRD2_F2       | GGCCGGGCGAGCTCCAATAAATAAAAC   | 68                   | 4286                  | <i>BRD2_e1~e11</i> | 15 (Fwd: 8, Rev: 7)         |
|              |                     |             |                   | BRD2_R2       | CGACGGAATCGACCCCGGG           |                      |                       |                    |                             |
|              |                     |             | <i>BRD2-DMA-1</i> | BRD2-DMA-1_F1 | CTCTGGGCTTTAAATCCTTGGGCGC     | 68                   | 3720                  |                    | 12 (Fwd: 6, Rev: 6)         |
|              |                     |             |                   | BRD2-DMA-1_R1 | ATTACCTCAGGACCCCTTCCAGGATCCCC |                      |                       |                    |                             |
|              |                     |             | <i>BRD2-DMA-2</i> | BRD2-DMA-2_F1 | ATCCCCGGTTCATAACTGCCAACACC    | 68                   | 3684                  |                    | 11 (Fwd: 6, Rev: 5)         |
|              |                     |             |                   | BRD2-DMA-2_R1 | TCCGCGAGTTACCTTGCCTCACTTGT    |                      |                       |                    |                             |
| <i>DMA</i>   | 162776 - 164862     | 2087        |                   | DMA_F1        | CCTCTGGACGCGTTTGTCTATTGC      | 68                   | 3160                  | <i>DMA_e1~e4</i>   | 10 (Fwd: 5, Rev: 5)         |
|              |                     |             |                   | DMA_R2        | CTTCATCCCTCCGTGCCACC          |                      |                       |                    |                             |
| <i>DMB1</i>  | 165247 - 167026     | 1780        |                   | DMB1_F4       | GGGCTTCATGCGCTTCTCCTACCTG     | 68                   | 3527                  | <i>DMB1_e1~e6</i>  | 13 (Fwd: 6, Rev: 7)         |
|              |                     |             |                   | DMB1_R5       | AAAGGCTGAGCCCAACCTAAAGCCCT    |                      |                       |                    |                             |
| <i>DMB2</i>  | 167630 - 170566     | 2937        |                   | DMB2_F1       | GAAACAGATGACGCTACCACGG        | 68                   | 3153                  | <i>DMB2_e1~e5</i>  | 26 (Fwd: 12, Rev: 14)       |
|              |                     |             |                   | DMB2_R1       | TCTTTAATGTCAGCACCACGGCG       |                      |                       |                    |                             |
|              |                     |             |                   | DMB2_F1       | GAAACAGATGACGCTACCACGG        | 68                   |                       |                    |                             |
|              |                     |             |                   | DMB2_R1B21    | TCTTTAATGTCAGCACCACGGTG       |                      |                       |                    |                             |
| <i>BF1</i>   | 171383 - 173416     | 2034        |                   | BF1_F1        | CCTATTCGCCCAACAGGTTACGCCCC    | 68                   | 4015                  | <i>BF1_e1~e8</i>   | 21 (Fwd: 10, Rev: 11)       |
|              |                     |             |                   | BF1_R3        | ACAAGGACCCACAAGAGCTGTGCC      |                      |                       |                    |                             |
| <i>TAP1</i>  | 174535 - 179331     | 4797        |                   | TAP1_F2       | GGGTAAGGATGGGTATAGGCTGGGCACT  | 68                   | 4727                  | <i>TAP1_e1~e11</i> | 27 (Fwd: 15, Rev: 12)       |
|              |                     |             |                   | TAP1_R1       | CAGTGGCACCAGTCCATGC           |                      |                       |                    |                             |
|              |                     |             | <i>TAP1-TAP2</i>  | TAP1-TAP2-F1  | TCCCACCCTGTCTTCAATCC          | 60                   | 899                   |                    |                             |
|              |                     |             |                   | TAP1-TAP2-R1  | CAGTGCCTTTTGAACGGCCC          |                      |                       |                    |                             |
| <i>TAP2</i>  | 179887 - 182923     | 3037        |                   | TAP2-F2       | CCTGATCACACAGAACAACACTGCAAC   | 68                   | 4568                  | <i>TAP2_e1~e9</i>  | 31 (Fwd: 16, Rev: 15)       |
|              |                     |             |                   | TAP2-R2       | TGATTGAAAGTAAAAGTAACGGCG      |                      |                       |                    |                             |
|              |                     |             |                   | TAP2-F1B21    | TCCAAACCCACATCATTCCCATT       | 68                   |                       |                    |                             |
|              |                     |             |                   | TAP2-R1B21    | CTACAAGGATCCAACCTTGTGGACAG    |                      |                       |                    |                             |
| <i>BF2</i>   | 185287 - 187303     | 2017        |                   | BF2_F2        | TTCCATCGGGTGTCTTCCGCC         | 68                   | 5339                  | <i>BF2_e1~e8</i>   | 21 (Fwd: 11, Rev: 10)       |
|              |                     |             |                   | BF2_R5        | CCTGATCCCAAGGAAGCCCTGG        |                      |                       |                    |                             |

The locations within the amplified regions were calculated using the 241 kb red jungle fowl B21 genomic sequence (accession number; AB268588). The length on the right side indicates non-redundant amplified segments, and "e" in "included exon" column indicate exons. Locations of amplicons were indicated to Fig. 1.

Sup Table 1B. Sequencing primers

| Gene region       | Intergenic region | Primer number | Sense primer          | Primer number | Antisense primer     |
|-------------------|-------------------|---------------|-----------------------|---------------|----------------------|
| <i>BG1</i>        |                   | 1             | TACAAACACTGTCTCCTCT   | 12            | GATTATCCTCAGTACCCAA  |
|                   |                   | 2             | TATATACCATCGCCCTG     | 13            | AATTCACAGTGGAGTAAGC  |
|                   |                   | 3             | ATGACTGCAGCTTACTCC    | 14            | TTCAGATCTGGGTGAGTCCT |
|                   |                   | 4             | TGCATGATGAGAAGGGTCAG  | 15            | CCTTTGCAGAGAGAAGGGAT |
|                   |                   | 5             | TCACCCAGATTTTCAACT    | 16            | ACTAGCTTCAGAACTGGGTG |
|                   |                   | 6             | CTCATCCACTATCGCAG     | 17            | AACTACCTGCGATAGTGG   |
|                   |                   | 7             | CACTCTGCAGTCTTCTATC   | 18            | GAGACCACAAAGCAGAGT   |
|                   |                   | 8             | AAAGCAAGACTCAGCCT     | 19            | GTCACAATTCTGGTTGG    |
|                   |                   | 9             | CTCCCTTTATATTCCTCC    | 20            | TTTGTGGATAAGTCTGCA   |
|                   |                   | 10            | ACGAGATAAGGCAGGAG     | 21            | CACTTTGGTTATTCATG    |
|                   |                   | 11            | GATGAGAGACGAAGATAGG   | 22            | CTCCTATTTCCCTGATCT   |
| <i>Blec4</i>      |                   | 1             | TTTCCCTACAAAGAGC      | 11            | CTTATCTCGTGGCTCTG    |
|                   |                   | 2             | GTTGGAGAACATAAAACAC   | 12            | CCCATTTTTTTTTACCC    |
|                   |                   | 3             | TCTCAATTTCTCCTGTATC   | 13            | TCAGGTGAAGGATTTCT    |
|                   |                   | 4             | CCCTAAGAATCAGTGCA     | 14            | CCTCACTGTGAATGCAC    |
|                   |                   | 5             | CGCAGTTCTGTTGGTTA     | 15            | TTTCGACACCTTTCCT     |
|                   |                   | 6             | ACCAAATATTGCCTTTC     | 16            | AATTTATTTGCAGTCCC    |
|                   |                   | 7             | ACTTCTGAGCCATGGAT     | 17            | CTACAGCCTTTCCTTC     |
|                   |                   | 8             | GAACTGGAGGAAAACAA     | 18            | TTCCATTCTCTCACATTG   |
|                   |                   | 9             | GATGAACCATTTTTGTAGG   | 19            | ACAAATGACCCGATTCTGT  |
|                   |                   | 10            | GTGAGCTGATTGCATGA     | 20            | CATTTCTTTTCTCTTCCTG  |
| <i>Blec2</i>      |                   | 1             | GCAAACAGATGCATTCT     | 11            | ATCCATAATGTGCAGGA    |
|                   |                   | 2             | CTCACTCTGTGCTGTTGTA   | 12            | AAATCTGCAGTCTCAGC    |
|                   |                   | 3             | CCTAAAGGGCATAATCC     | 13            | TGATCACACAACAATTCC   |
|                   |                   | 4             | AGTCTGCCTTGTGGAC      | 14            | ATGTCCTGTGTCCATC     |
|                   |                   | 5             | TGGTTGCACTCAATTAA     | 15            | TCTGAGAAAACCCAGCA    |
|                   |                   | 6             | GGATCTGATCACTCACC     | 16            | CAGAGAGCAGCAAAATG    |
|                   |                   | 7             | GATGGACACAGGGACAT     | 17            | GTTGGTTAACGCTTTTTCT  |
|                   |                   | 8             | CTCAGAAAGTTCACGAGAA   | 18            | GCAATTCTGGTAAATGAG   |
|                   |                   | 9             | GGAAGAAAGGCAATATT     | 19            | CTAAGAATCAGTGCATCCT  |
| <i>Blec1</i>      |                   | 1             | TCCTTTGCATATTGCTG     | 12            | ATAACCTCTCCCTCCCT    |
|                   |                   | 2             | TGCAGCATCCACGTGGAAT   | 13            | GAGGACTGAAATTAATGC   |
|                   |                   | 3             | CAGGTGGTAACAATGAAA    | 14            | GATGTGTTAAGGGCATG    |
|                   |                   | 4             | GCACCCAGAAATATATCC    | 15            | GTGAGCTGGAAGGTAAC    |
|                   |                   | 5             | TGCGATTCTGTGATGTT     | 16            | GTCCACAGACCTCTTG     |
|                   |                   | 6             | GAGCAGAGAAAACCCCT     | 17            | TAGTAGCATTTTCCCTCTGA |
|                   |                   | 7             | AATGATGAGTAATCCACC    | 18            | AATCTCAGTGCCTTGAACCT |
|                   |                   | 8             | GATGAGAGCAATTGGAC     | 19            | ATGAACCTCTATGACCCA   |
|                   |                   | 9             | GCTTCACAATGAGACACA    | 20            | TCCTGTGCTACTGAGC     |
|                   |                   | 10            | TTGATTTCACTACTGTG     | 21            | CAGTATTTCCCTTTGGAG   |
|                   |                   | 11            | CTAATGACCGCTAAAATC    |               |                      |
| <i>BLB1</i>       |                   | 1             | CTAATGACCGCTAAAATC    | 14            | CACCGTAAAAGTGAATTC   |
|                   |                   | 2             | GGAATAGAAGAGCACAGAC   | 15            | ATGCTGAATTAGCTGCT    |
|                   |                   | 3             | ATGCGAACGGGAACGGGAAT  | 16            | GGAGATCGAGGTGAAGT    |
|                   |                   | 4             | ACCTGGTACGTCCAGTC     | 17            | AGTGCCACTACCTGAAC    |
|                   |                   | 5             | TCATTCAITCGGTTCTC     | 18            | GAGTGTGAGGAAAGCC     |
|                   |                   | 6             | GTTGAGGTAGTGGCACT     | 19            | GATGAGCACTGGATGAC    |
|                   |                   | 7             | TTCTCTGACTACTCTGC     | 20            | AGAAACCCCGGAGCCCTTC  |
|                   |                   | 8             | GGCTATCCGTGCGCTG      | 21            | CCGTGCTGGTGGCACT     |
|                   |                   | 9             | CTTCTGGTGATTTTATGCAA  | 22            | GCACTGGATGACCATGGAG  |
|                   |                   | 10            | GCAGCTAATTCAGCATCCCT  |               |                      |
|                   |                   | 11            | CCGAGACCCCTCACCTTGG   |               |                      |
|                   |                   | 12            | TGCGCACGGCCAGAAG      |               |                      |
|                   |                   | 13            | GCTCCCCATGGCTGCT      |               |                      |
| <i>BLB1-TAPBP</i> |                   | 1             | GTAACCCCATGTTCCACC    | 6             | AACGAAAAGGTAACCAC    |
|                   |                   | 2             | TGTCACCCAGATGTCCACAA  | 7             | CAAAGTTCTCTCTGTGT    |
|                   |                   | 3             | CAATGTCATCCAGGTGTCCA  | 8             | AAGGTGAGTGTGTTCC     |
|                   |                   | 4             | GGAATGAGAATGGTGAG     |               |                      |
|                   |                   | 5             | GGAACAGCACTCACCTT     |               |                      |
| <i>TAPBP</i>      |                   | 1             | GGCGTCTTCCACCCTAAATT  | 19            | ACAGAAGGAACCATCACTGC |
|                   |                   | 2             | AACTGTCATAGGCCAGCAGG  | 20            | ACTGCACTGGCCAAACCAAT |
|                   |                   | 3             | TAGAAGCCAGACACGTGGCA  | 21            | CCTTTACTTCCCACAATGCT |
|                   |                   | 4             | TTTAGGGTAGAGCCAACGGA  | 22            | GTGTTTCCATGTCCCCTCAT |
|                   |                   | 5             | GGGACAGTTTGGGAGCTATT  | 23            | GGTCAGATAGGACATATGGG |
|                   |                   | 6             | CATGAGGACAGGGAGAAACT  | 24            | TCCAAGCACCCCAAACTCA  |
|                   |                   | 7             | GACAAAAGATGCAGAGGAGCA | 25            | CAAACACTGTTCTGAATGA  |
|                   |                   | 8             | GAGAGAACTTTGGGGTGAAA  | 26            | ACTGTGCCCTTTGGGGGGG  |
|                   |                   | 9             | AGCCGCAGCCCCGAGCCAT   | 27            | AACCCCGAGCCGGCTCTGA  |
|                   |                   | 10            | CAGTGATGGTTCTTCTGTG   | 28            | AGACAGTGTGCAGCTCCAC  |

|                   |    |                       |    |                        |
|-------------------|----|-----------------------|----|------------------------|
|                   | 11 | AAGGCGCAGTGCAGGTGGAT  | 29 | ATGGAACCTACAGCCGGACG   |
|                   | 12 | TTCTTCGGGGACAGCGTCAC  | 30 | CCTTGCAGAAATCGCAGTGA   |
|                   | 13 | ATGAGGCCACAGAGGACAAA  | 31 | CACCAATGTCCCCAAATCC    |
|                   | 14 | ATGGGAGCATTGTGGGAAGT  | 32 | TTCACCTCCCCATGTCCCC    |
|                   | 15 | GACGTAAGGATGAGGTTCCA  | 33 | TATTGACGAAGTGACGGAGGGG |
|                   | 16 | TCACCAACCCAGGACTTCCT  | 34 | AAAGCAGCGGAGAGCGATGG   |
|                   | 17 | CGCTGACATTGAAGGTGACT  | 35 | TCACAGTGGCCCTGGCGGTG   |
|                   | 18 | CAAAGACGTGGAGCTGCAGC  |    |                        |
| <i>BLB2</i>       | 1  | TTTAAATCCTGAAACC      | 10 | CCTCATCCTTAGCTCAC      |
|                   | 2  | GCAGAAAATGGTGTGAC     | 11 | GATGGTCTCCAATGAC       |
|                   | 3  | TGAGCACTGGATGACCATG   | 12 | GCGTTGCTGTTCCAGTATTC   |
|                   | 4  | ATCTACAACCGCAGCAGTT   | 13 | CTGAAACACAGCGAGAC      |
|                   | 5  | GACTGGACGTACCAGGT     | 14 | GCAGCTAATTCAGATCCCT    |
|                   | 6  | GTCTCGCTGTGTTTCAG     | 15 | CCGAGACCCTCACCTTGG     |
|                   | 7  | AGAAACCCCGGAGCCCTTC   | 16 | TGCGCACGGCCAGAAG       |
|                   | 8  | CCGTGCTGGTGGCACT      | 17 | GCTCCCCATGGCTGCT       |
|                   | 9  | GCACTGGATGACCATGGAG   |    |                        |
| <i>BLB2-BRD2</i>  | 1  | GGATGCTGAATTAGCTG     | 5  | CAGCGGTTTTATTAGGATGG   |
|                   | 2  | TATGGATAACCCAAAGC     | 6  | GTGACAAATGACACAGCA     |
|                   | 3  | GAAAAAATCCACGAGT      |    |                        |
|                   | 4  | AACAAACAGTAAAACCTGC   |    |                        |
| <i>BRD2</i>       | 1  | AACAAACAGTAAAACCTGC   | 9  | TTAAACCCACAGCACCACA    |
|                   | 2  | TCATGGCTGTGAAATTC     | 10 | GTGCACATCATCCAGTC      |
|                   | 3  | TTTTGGTTTTGAAACGGGG   | 11 | GATGAGGATGAGAGCAGTAG   |
|                   | 4  | AACATTAACCGGACATCAGCG | 12 | AAACCCCAAGAAGGACTT     |
|                   | 5  | GAATCCGGCAAGTCTTCTT   | 13 | CAGATGACATTGTGCTG      |
|                   | 6  | AAGGTTGATGAATGGAGGC   | 14 | CTTTAGCAATTAGTGCC      |
|                   | 7  | GGTTTTAGGAGCTCAA      | 15 | AAGTGGTGAAGGCCCTG      |
|                   | 8  | GGATTATGCCCTAAGA      |    |                        |
| <i>BRD2-DMA-1</i> | 1  | TATGCCCTAAGAGAGG      | 7  | TAATCCAACTCCACAG       |
|                   | 2  | AGGGAGCAAAAGACAAC     | 8  | CCCAGCTGCTAAATCCTCA    |
|                   | 3  | AGAATTCACATGGACCA     | 9  | GGTCCATGTGAATTCTGT     |
|                   | 4  | TCTGTGCTATGCACCTC     | 10 | CATCAGTTGTATCCCACT     |
|                   | 5  | TCATAACTGCCAACACC     | 11 | CGTTTGTCTCGTTTATGTG    |
|                   | 6  | TTATATAGACACCACCTGG   | 12 | TCTATCCGGTTCTTACC      |
| <i>BRD2-DMA-2</i> | 1  | TTCACATTCTGCAGCAT     | 7  | TTTCCCGCTCTATATC       |
|                   | 2  | GTCCGCAATTTGTGTGGC    | 8  | CTCACTACCTCACCACAG     |
|                   | 3  | TCTTTTAGTTTCTCAAGGC   | 9  | GAAATTCCTGTGAGGTG      |
|                   | 4  | AAAGGCTCTCAAAGACC     | 10 | TCCATCAAATCTGGTTC      |
|                   | 5  | ACATCCAGGGCAGAAAAAG   | 11 | AATGACAAACGCGTCCAGAG   |
|                   | 6  | CACAAGACACATTTTTACC   |    |                        |
| <i>DMA</i>        | 1  | CCCCAAAAACATACTTT     | 6  | CTGCTGTCTCCATTGTC      |
|                   | 2  | GCACTCTGGTACATCTAT    | 7  | CGCAAGCAATTAATAAG      |
|                   | 3  | ATTGGCTAAACTGGTTG     | 8  | ATCTCACTCAACCCC        |
|                   | 4  | AGCTCTTCTCATTGATG     | 9  | ATTCTGTGAGCAAATC       |
|                   | 5  | TGTGTTCCCAATGGACATCC  | 10 | CATCAGTGAGGACACATCGT   |
| <i>DMB1</i>       | 1  | GGTTCTCACTCCAATCC     | 7  | GGAACGAAGAATTGGAG      |
|                   | 2  | GGAACAGATGACGCTA      | 8  | CCTACCATGATCCCATA      |
|                   | 3  | CCCGTACTCACTGATGT     | 9  | ATCAGACTTTGCCACCT      |
|                   | 4  | TTTTAGGGTGCAACATGGGG  | 10 | GTGGTATCATCATTAGGA     |
|                   | 5  | GCATGAGGAAGTGAAG      | 11 | CACTCAATTTGTTGCA       |
|                   | 6  | CACCTACACATGCTCAG     | 12 | CTGACAGAAAGCTGAAAAC    |
| <i>DMB2</i>       | 1  | TCTCTGCCTAATGAAACTC   | 13 | GAGTTTCATTAGGCAGAGA    |
|                   | 2  | CAATATTGAGGACACTCTG   | 14 | ACAGTCTTCCCAGAACC      |
|                   | 3  | GATTTTGGAGTGATGCT     | 15 | CAGAGTGTCTCAATATTG     |
|                   | 4  | AGCTCGATGTTATGTCC     | 16 | AGCATCACTCCAAAATC      |
|                   | 5  | ACCCTCTGGTGTGCTAC     | 17 | TCCCATGAGATTCTTAAAG    |
|                   | 6  | GTGGCTTTGAAGAACAT     | 18 | TGCTGTCATTGTTGAGG      |
|                   | 7  | ATGGAGTTTGCTTCAAG     | 19 | TGCTAAACAACACCCTC      |
|                   | 8  | GGAAGTGGACCTACCAG     | 20 | ATGTTCTTCAAAGCCAC      |
|                   | 9  | CAGCTTGCTCTTCATTG     | 21 | CTTGAAGCAAATCCAT       |
|                   | 10 | GGTATCTGTTGATCCCTAT   | 22 | CATCTCACTTCCCTGTAG     |
|                   | 11 | GGTCACAACCTACCCTTC    | 23 | CTGGTAGGTCCAGTTCC      |
|                   | 12 | CGCAGGAGTGAGCAT       | 24 | CAATGAAGAGCAAGCTG      |
|                   |    |                       | 25 | CAAAAATGGTCAATCC       |
|                   |    |                       | 26 | GACTGTTACCTGAAGG       |
| <i>BF1</i>        | 1  | TTAAGGAGGGGACAACAGTG  | 11 | AGGCAGAATGCGCTCCCTCAG  |
|                   | 2  | CTGGCGCCGATGACGTCA    | 12 | TGAGCCGCGGGTGGGGGTCT   |
|                   | 3  | AGATCGGACAGGGCAATGAG  | 13 | TAGTGCACGAAGATTTCCCG   |
|                   | 4  | TGGGAGCCCGGAGC        | 14 | GCTCCGGGGTCCCA         |
|                   | 5  | AGATACGTGAATACGGGAAGG | 15 | CCTTCCCGTATTCCAGTATCT  |
|                   | 6  | CCGTGCCATTGTGGC       | 16 | GCCACAATGGCGACGG       |
|                   | 7  | GGATCCAGCAGCTCGAGC    | 17 | CAAAGCACCAGGAATGGG     |

|    |                         |    |                           |
|----|-------------------------|----|---------------------------|
| 8  | TGCTGACTGTTATGCTTTGCCTG | 18 | CATAGGAAGCAGAATGAGATGTGAG |
| 9  | TTCTGCACTGTGCTGTGGTT    | 19 | TGGGAAAATGAGAGTTCTGCCA    |
| 10 | TGGCAGAACTCTCATTTTCCCA  | 20 | GAGGGCAGCAGAACAACAT       |

|    |                             |
|----|-----------------------------|
| 21 | AAAGCCGCATGTTTGTACCC        |
| 16 | ATAGCGGGAGTTATGGATGGG       |
| 17 | TCATACTCGACGAGCACACCAG      |
| 18 | GATATGAAACAAGGAGATACATGGAGG |
| 19 | GAACCCGCTCTCAAGGTGG         |
| 20 | TGCTGCACTACTTCCCACAC        |
| 21 | GGACCTCGTCACCTTCTCTCC       |
| 22 | GACATTGACAGAACAGGAAGGTGAC   |
| 23 | GGACCAGTGGTGTATGGGATG       |
| 24 | TGTGCGAAGCTTTGCCAA          |
| 25 | CATTATCCCTTCCACATGGGTT      |
| 26 | GCTCACCGCGCTGGC             |

*TAP1*

|    |                        |
|----|------------------------|
| 1  | GTGGGAGGAGAAACGGTCAG   |
| 2  | GGCAGGCGAGTGATGAAGTC   |
| 3  | AACCCATAGGAGATGTTGGCG  |
| 4  | AGGTAGGAGTGCTGGTAGGCG  |
| 5  | AGCTCCAGTGATACGCCCTG   |
| 6  | CCACCTTGAGGACGGGTTTC   |
| 7  | CGGTCCAGGAACTCAAAGATCT |
| 8  | GGAGGAAGGTGACGAGGTCC   |
| 9  | ACCTTCTGTTCTGTCAATGTCC |
| 10 | GTGCATGTATGGAGGGAACA   |
| 11 | GCACATGGATAGGGCAATGA   |
| 12 | GCACGTCTCCGCATCC       |
| 13 | GACGCGGCGCTGGAG        |
| 14 | CAGTACCTGCTGAGGCCCAG   |
| 15 | CACCCCAAAGCTCAGAGG     |

*TAP1-TAP2*

|    |                        |
|----|------------------------|
| 1  | TCCCACCTGTCTTCAATCC    |
| 1  | GTTGTGTGCTCCAGGCTGG    |
| 2  | CGATGCCGCCCTACATTCTGCG |
| 3  | GCCCCGCATCTTCTGACC     |
| 4  | GGCAAAGGAGGCAGAGGCC    |
| 5  | TCTGGATGTCTCCGCCA      |
| 6  | TGACCCTTTGTGATTGT      |
| 7  | GTTGGCACTCAATACAA      |
| 8  | ACGGAAGTCTATGACAC      |
| 9  | CACAGCAAGGATGAGAG      |
| 10 | AGTGCAGGAGTCCATCT      |
| 11 | CACTGGCGTACTCCTAT      |
| 12 | TGGAGAGATTCTATGAACC    |
| 13 | GGATAACATTGCCTACG      |
| 14 | AATGGTGAGCACTGAGCAGT   |
| 15 | CACTGAGAACCATGGAG      |
| 16 | TCTCCATATGAAAGCCA      |

*TAP2*

|    |                        |
|----|------------------------|
| 2  | CAGTGCTTTTAGAACGCCCC   |
| 17 | CTTCCAGTCCGGCTCCCCACAG |
| 18 | GGTCAGGAAGATGGC        |
| 19 | GGCCTCTGCCTCCTTTGC     |
| 20 | GCGGAGGACATCCAG        |
| 21 | CCCAGATATGGACAGAG      |
| 22 | TTGATATTGAGTGCCAA      |
| 23 | CTCTCATCCTTGTCTGTG     |
| 24 | AGATGGACTCCTGCACT      |
| 25 | ATAGGAGTACGCCAGTG      |
| 26 | TCCCAGTTCAGGTAATC      |
| 27 | GGTTCATAGAATCTCTCCA    |
| 28 | CAATGTTATCCCGAATG      |
| 29 | CTCCATGGTTCAGTG        |
| 30 | TCTGGAGATACTCAAAGCCC   |
| 31 | TGGCTTTCATATGGAGA      |

*BF2*

|    |                        |
|----|------------------------|
| 1  | AAAGCCGCATGTTTGTACCC   |
| 2  | TGGGAAAATGAGAGTTCTGCCA |
| 3  | CCAAGCACCCAGGAATGGG    |
| 4  | GCCACAATGGCGACGG       |
| 5  | CGGCAGTGAGGGCCG        |
| 6  | CCTTCCGTATTCCACGTATCT  |
| 7  | GCTCCGGGGCTCCCA        |
| 8  | TAGTGCACGAAGAGTTCCCCG  |
| 9  | GCTGCACTCTCAAGTCCGC    |
| 10 | AGGCAGAAATGCCTCCCTCAG  |

|    |                          |
|----|--------------------------|
| 11 | CAGTCCCGCAGAAGGCTG       |
| 12 | TGGCAGAACTCTCATTTTCCCA   |
| 13 | TTCTGCACTGTGCTGTGGTT     |
| 14 | TGCTGACTGTTATGCTTTGCCTG  |
| 15 | GGATCCAGCAGCTCGAGC       |
| 16 | CCGTGCGCCATTGTGGC        |
| 17 | AGATACGTGGAATACGGGAAGG   |
| 18 | TGGGAGCCCCGGAGC          |
| 19 | AGATCGGACAGGGCAATGAG     |
| 20 | GAGTAGGAAAAGCTGAAGGAGCTG |
| 21 | CTGGCGCCCCGATGACGTCA     |
